# Supplementary material for: Optimized Quantification of Fragmented, Free Circulating DNA in Human Blood Plasma Using a Calibrated Duplex Real-Time PCR
Source: PLoS One. 2009 Sep 28;4(9):e7207. doi: 10.1371/journal.pone.0007207 (PMC2746311; doi:10.1371/journal.pone.0007207)
Supplement: Supporting Information File S1 — Statistical analysis of results. (0.03 MB PDF) [file pone.0007207.s001.pdf]

## Supporting Information File S1

### Statistical analysis of results presented in Fig. 1 B:

In order to confirm that Assay 1 estimates the male/female ratio correctly and that Assay 2 and Assay 3 differ significantly from Assay 1, we tested if the regression curve of Assay 1 is coincident (has the same slope and intercept) with the regression curve of Assay 2 or Assay 3.

In a first step the variances  $\sigma^2$  of the three different data sets are tested for equality by computing the residual variances using the following formula:

$$\hat{S}^2 = \frac{1}{n-2} \cdot \sum_{i=1}^n \left( y_i - \hat{y}_i \right)^2 \quad \text{with} \quad \hat{y}_i = \text{empirical regression line } \hat{a} + \hat{b} \cdot x_i$$

Table with data sets of the three assays and the calculated residual variances  $\hat{S}^2$

(see also Fig. 1 B)

| percentage<br>of male<br>DNA | Assay 1<br>Dys14/18S<br>[%] | Assay 2<br>SRY/c-myc<br>[%] | Assay 3<br>SRY/18S<br>[%] |
|------------------------------|-----------------------------|-----------------------------|---------------------------|
| 0                            | 0                           | 0                           | 0                         |
| 5                            | 9.488                       | 16.764                      | 22.517                    |
| 10                           | 14.523                      | 17.962                      | 47.437                    |
| 20                           | 25.259                      | 84.667                      | 77.489                    |
| 30                           | 36.821                      | 92.005                      | 107.761                   |
| 50                           | 52.284                      | 141.951                     | 310.609                   |
| $\hat{S}^2$                  | 24.390                      | 212.520                     | 1654.429                  |

For verifying the null hypothesis that the residual variance of the Assay 1 data set is equal to the residual variance of the Assay 2 or Assay 3 data sets ( $H_0: \sigma_1^2 = \sigma_2^2$  or  $H_0: \sigma_1^2 = \sigma_3^2$ ), the two-tailed  $F$ -Test is used. The test can be carried out by dividing the larger residual variance  $\hat{S}_1^2$  by the smaller residual variance  $\hat{S}_2^2$ :

$$f = \frac{\hat{S}_1^2}{\hat{S}_2^2} \quad \text{with } (S_1 \geq S_2)$$

Based on the  $1-\alpha/2$  percentage point in the F-distribution table with  $\alpha = 0.05$  (i.e., corresponding to a confidence level of 95%) and  $m_1 = n_1 - 2$  and  $m_2 = n_2 - 2$  degrees of freedom, the null hypothesis is rejected for  $f \geq F_{m_1; m_2; 1-\alpha/2}$ . In this case:  $F_{m_1; m_2; 1-\alpha/2} = 9.6$ . The null hypothesis is accepted when  $f \leq F_{m_1; m_2; 1-\alpha/2}$ . The residual variances of the data set from Assay 1 and those from Assay 3 differ significantly because  $f \geq F_{m_1; m_2; 1-\alpha/2} = 67.81 \geq 9.6$ , whereas the null hypothesis for the comparison of Assay 1 and Assay 2 can be accepted:  $f \leq F_{m_1; m_2; 1-\alpha/2} = 8.71 \leq 9.6$ .

As Assay 1 and Assay 2 do not differ significantly in terms of their respective residual variances, we tested if the regression coefficients (i.e., slopes)  $\hat{b}_1$  and  $\hat{b}_2$  of these 2 assays are significantly different. To verify the null hypothesis that  $\hat{b}_1$  and  $\hat{b}_2$  are equal the following formulas can be used:

$$t_r^{(b)} = \frac{\hat{b}^{(1)} - \hat{b}^{(2)}}{\hat{S}^* \times \sqrt{\frac{1}{(n_1 - 1) \times s_x^2} + \frac{1}{(n_2 - 1) \times s_x^2}}} \quad \text{with } \hat{S}^* = \sqrt{\frac{(n_1 - 2) \times \hat{S}_1^2 + (n_2 - 2) \times \hat{S}_2^2}{n_1 + n_2 - 4}}$$

Table with calculated values for variances  $\hat{S}^2$ ,  $\hat{S}^*$ ,  $s_x^2$  and slope  $\hat{b}$

| values      | Assay 1 | Assay 2 |
|-------------|---------|---------|
| $\hat{S}^2$ | 24.390  | 212.520 |
| $\hat{b}$   | 1.0254  | 2.9299  |
| $\hat{S}^*$ | 10.88   |         |
| $s_x^2$     | 344.167 | 344.167 |

Referring to the  $1-\alpha/2$  percentage point (95% level of confidence), based on  $m_1 = n_1 - 2$  and  $m_2 = n_2 - 2$  degrees of freedom in the tabulated T distribution, the results (slope) of Assay 2 differ significantly from the results (slope) of Assay 1. The t-value for the comparison of

Assay 1 and Assay 2 is about  $t_r^{(b)} = 5.13$  whereas the  $t_{m;1-\alpha/2}$  determined for  $m = n_1 + n_2 - 4$  degrees of freedom and a 95% confidence level ( $1-\alpha/2$  percentage point) is about 2.3.

Therefore is  $t_r^{(b)} \geq t_{m;1-\alpha/2}$  and the null hypothesis is rejected.

Based on this analysis, it is determined that the results obtained by Assay 2 and Assay 3 differ significantly from the results obtained by Assay 1.
